# Supplementary material
Source: PubMed Central journal article supplement (PMC9264225)
Supplement: jamaophthalmol-e222135-s001.pdf [file jamaophthalmol-e222135-s001.pdf]

## Supplementary Online Content

Coyner AS, Oh MA, Shah PK, et al. External validation of a retinopathy of prematurity screening model using artificial intelligence in 3 low- and middle-income populations. *JAMA Ophthalmol*. Published online June 30, 2022. doi:10.1001/jamaophthalmol.2022.2135

### **eFigure.** Selection of Study Population

This supplementary material has been provided by the authors to give readers additional information about their work.

**eFigure. Selection of Study Population.** Infants from different LMICs were screened for ROP using their respective inclusion criteria. For this study, infants were required to have an exam at or after 30 weeks PMA, GA recorded, and retinal fundus images (centered on the macula).

India  
February 2019–December 2020  
BW ≤ 2000 grams or GA < 34 weeks  
(GA < 37 weeks if other risk factors)  
2730 babies

350 babies excluded  
345 w/o exam at PMA ≥ 30 weeks  
5 treated before PMA ≥ 30 weeks

80% of dataset

20% of dataset

29 babies excluded  
57 eyes w/ TR-ROP Dx at exam

Training Dataset  
1848 w/o TR-ROP  
27 w/ TR-ROP

Validation Dataset  
462 w/o TR-ROP  
14 w/ TR-ROP

India  
January 2021–June 2021  
BW ≤ 2000 grams or GA < 34 weeks  
(GA < 37 weeks if other risk factors)  
2271 babies

1509 babies excluded  
1313 w/o PMA recorded  
5 w/o GA recorded  
56 w/o exam at PMA ≥ 30 weeks  
5 treated before PMA ≥ 30 weeks  
130 w/o posterior-pole centered images

Test Dataset  
735 w/o TR-ROP  
27 w/ TR-ROP

Mongolia  
December 2015–January 2017  
BW ≤ 2000 grams or GA < 37 weeks  
319 babies

2 babies excluded  
2 w/o exam at PMA ≥ 30 weeks

Test Dataset  
264 w/o TR-ROP  
53 w/ TR-ROP

Nepal  
October 2016–August 2018  
BW ≤ 1700 grams or GA < 36 weeks  
373 babies

43 babies excluded  
43 w/o exam at PMA ≥ 30 weeks

Test Dataset  
327 w/o TR-ROP  
3 w/ TR-ROP
